# Supplementary material for: Synthesis of high refractive index polymer with pendent selenium-containing maleimide and use as a redox sensor
Source: Royal Society of Chemistry journal article supplement (doi:10.1039/c9py00660e), 2019-01-01
Supplement: c9py00660e1.pdf [file c9py00660e1.pdf]

## Supporting Information

### Synthesis of High Refractive Index Polymer with Pendent Selenium-containing Maleimide and Using as Redox Sensor

Qilong Li<sup>1</sup>, Kar Lok Ng<sup>2</sup>, Xiangqiang Pan<sup>1\*</sup>, and Jian Zhu<sup>1\*</sup>

1. State and Local Joint Engineering Laboratory for Novel Functional Polymeric Materials; Jiangsu Key Laboratory of Advanced Functional Polymer Design and Application; College of Chemistry, Chemical Engineering and Materials Science, Soochow University, Suzhou, 215123, China. Tel: +86 512 65880726; Fax: +86 512 65882787; E-mail: panxq@suda.edu.cn; chemzhujian@suda.edu.cn;
2. The Faculty of Science, University of Waterloo, Waterloo ON N2L3G1, Canada.

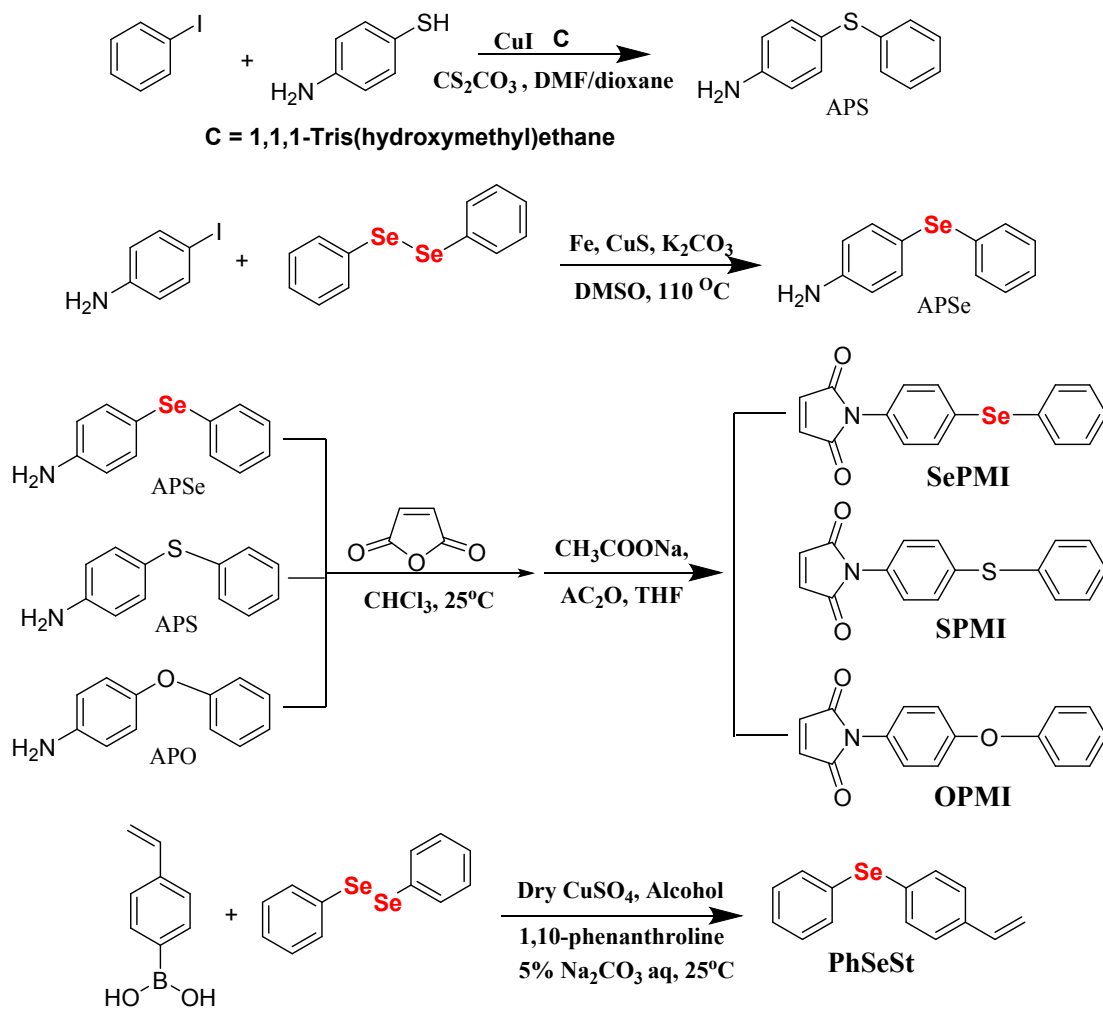

**Scheme S1.** Synthetic routes of monomers and intermediates referred to the ever-reported literature and optimized the reaction condition.

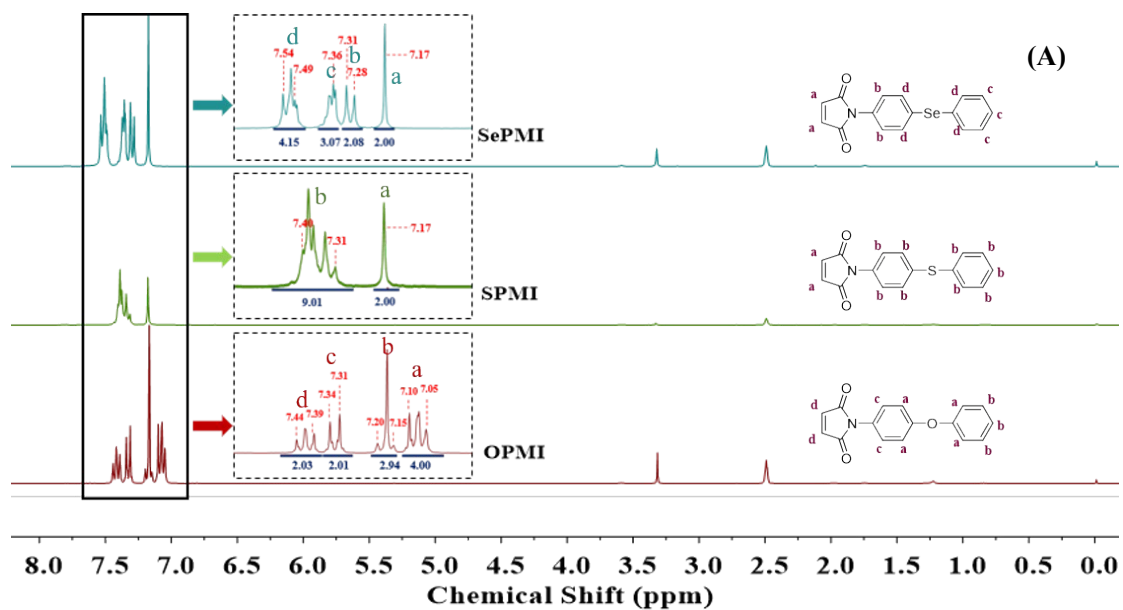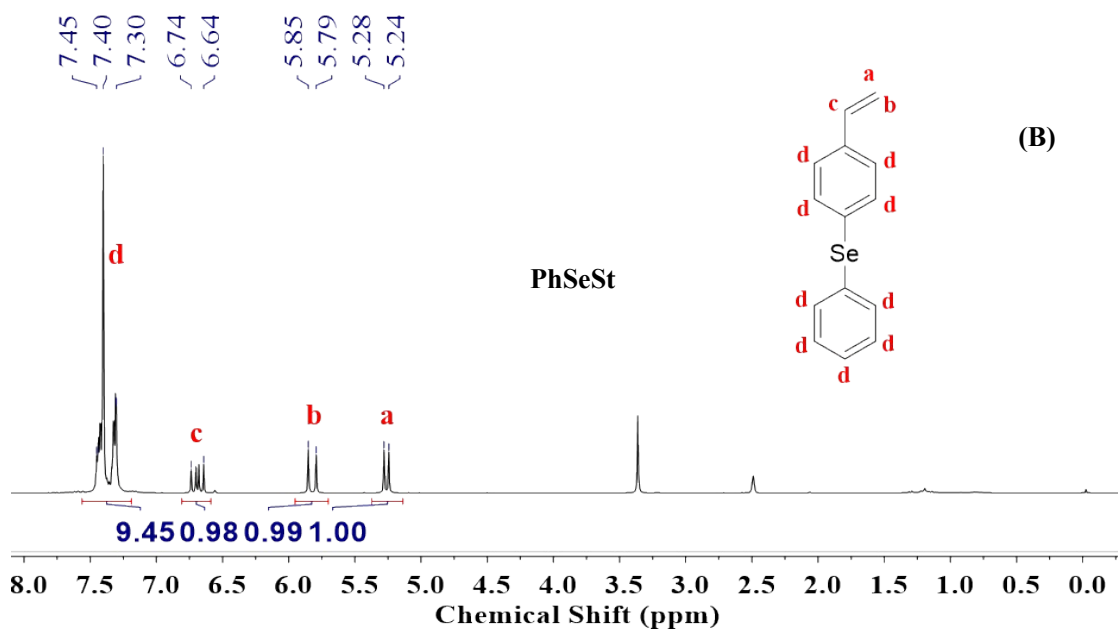

**Figure S1. (A)**  $^1\text{H}$  NMR of three maleimides (OPMI, SPMI and SePMI) in  $\text{DMSO-}d_6$ ; **(B)**  $^1\text{H}$  NMR of PhSeSt in  $\text{DMSO-}d_6$ .

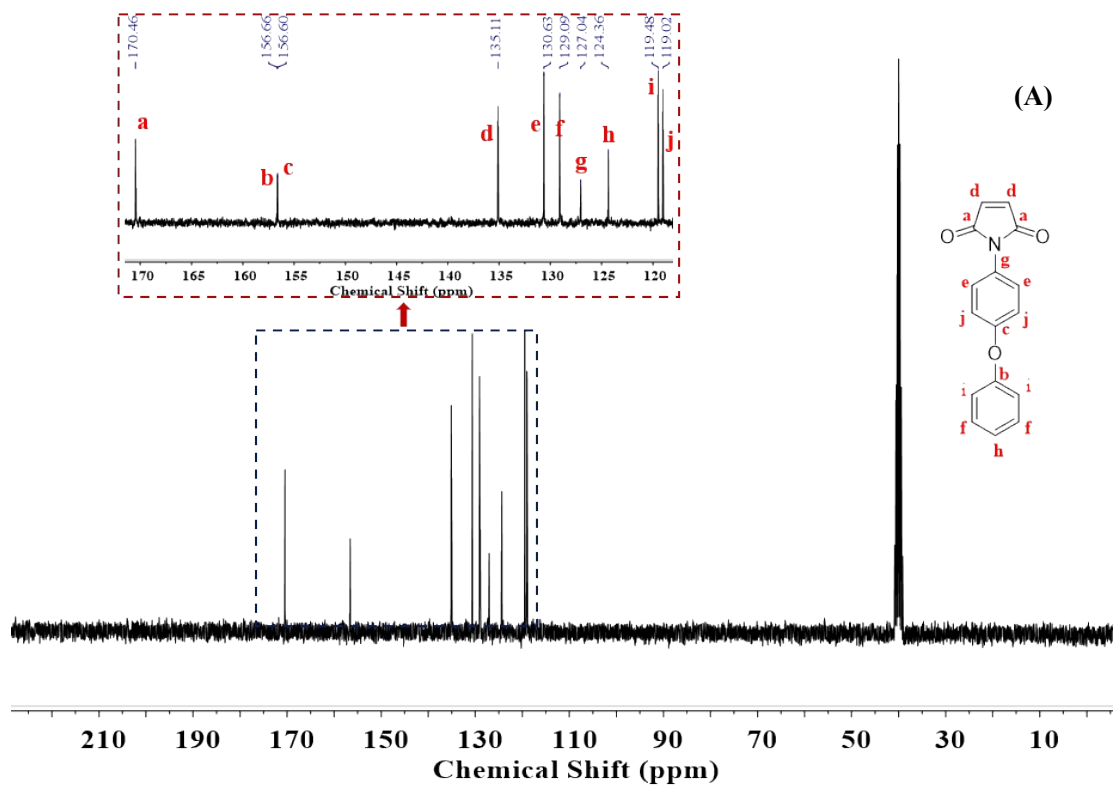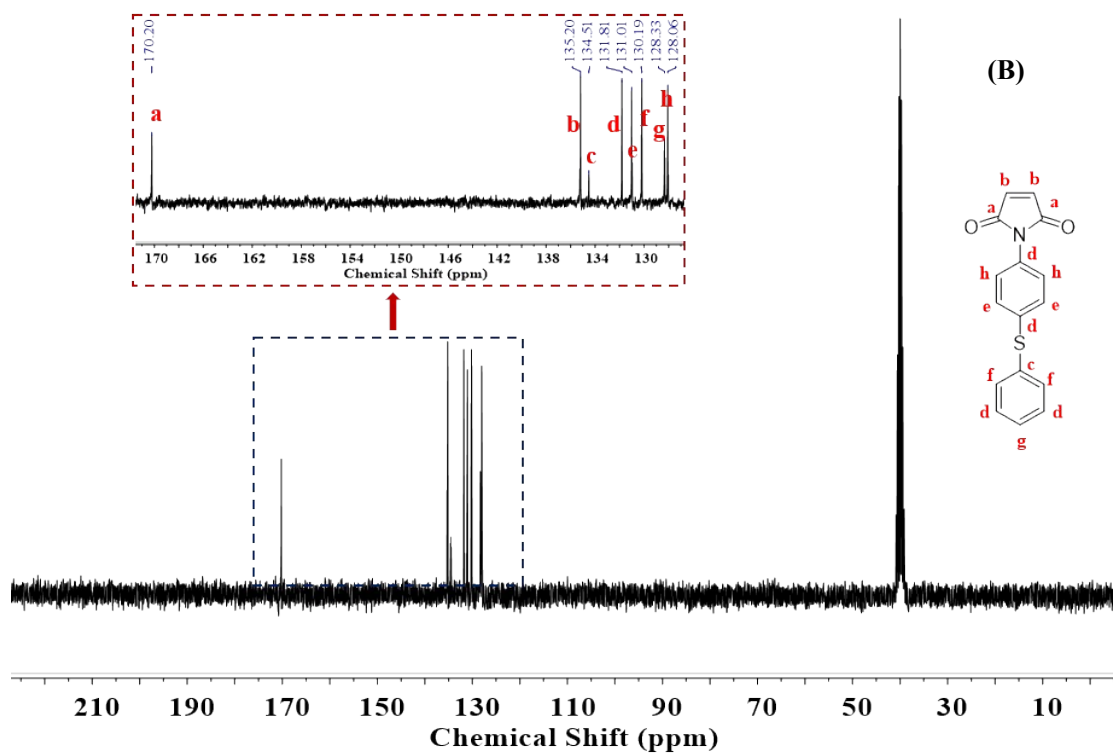

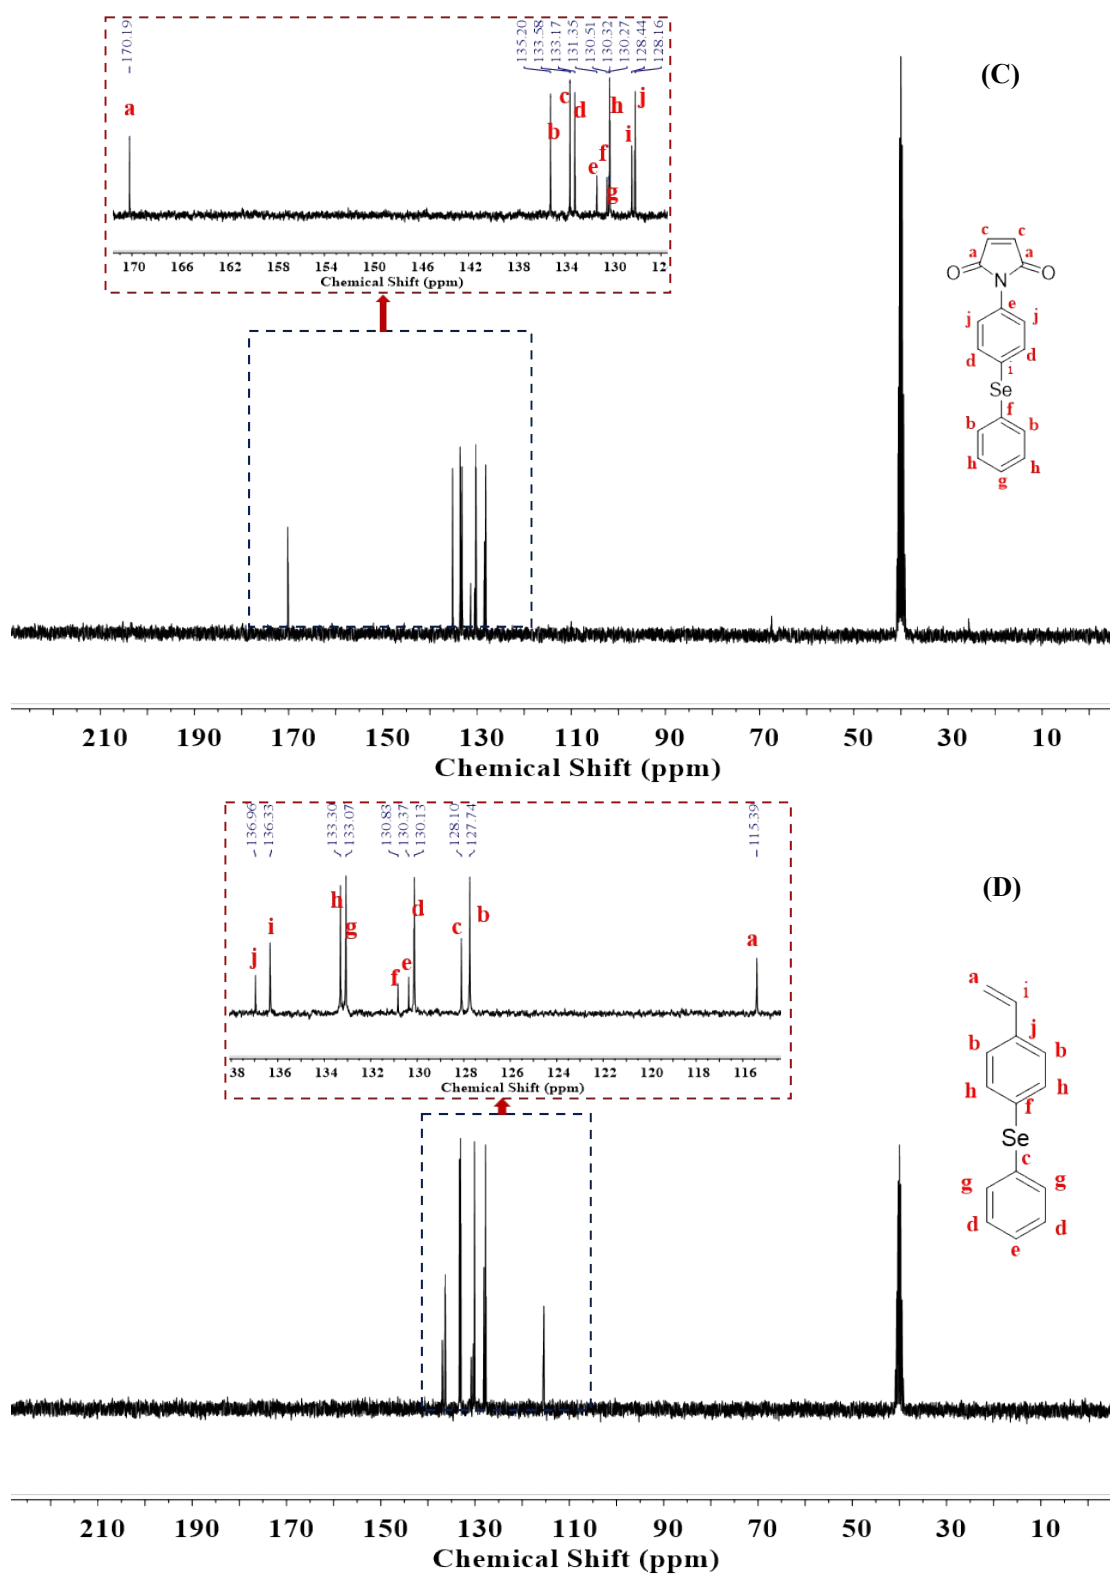

**Figure S2.**  $^{13}\text{C}$  NMR of four monomers in  $\text{DMSO-}d_6$  (A, OPMI; B, SPMI; C, SePMI; D, PhSeSt).

## Result and discussion

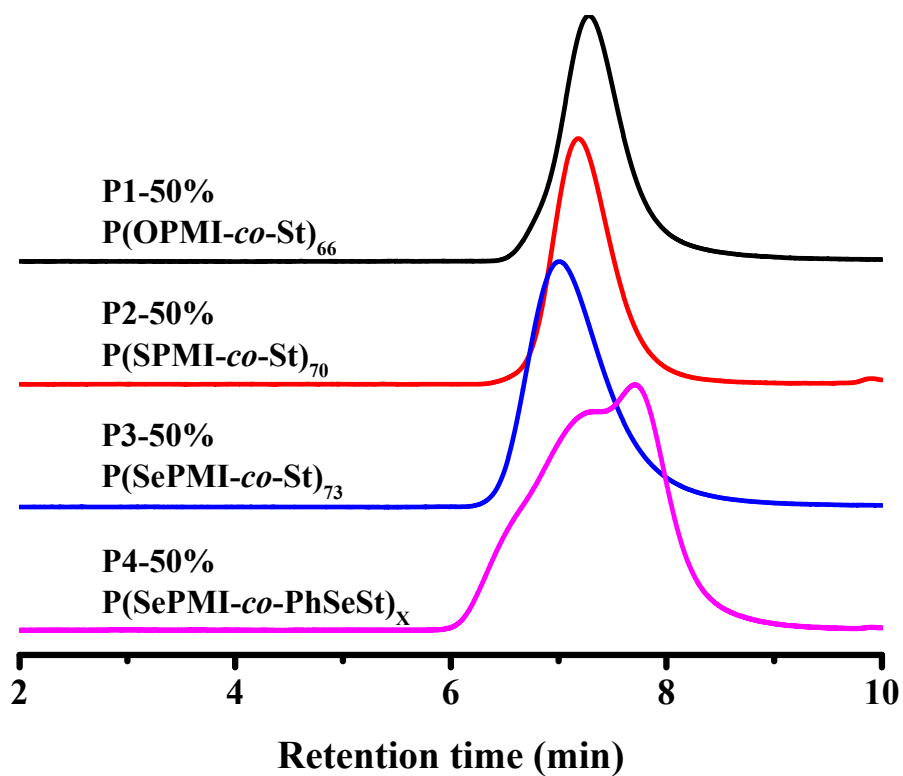

**Figure S3.** The GPC trace of four copolymers (P1-50% to P4-50%) in DMF and PS used as standard.

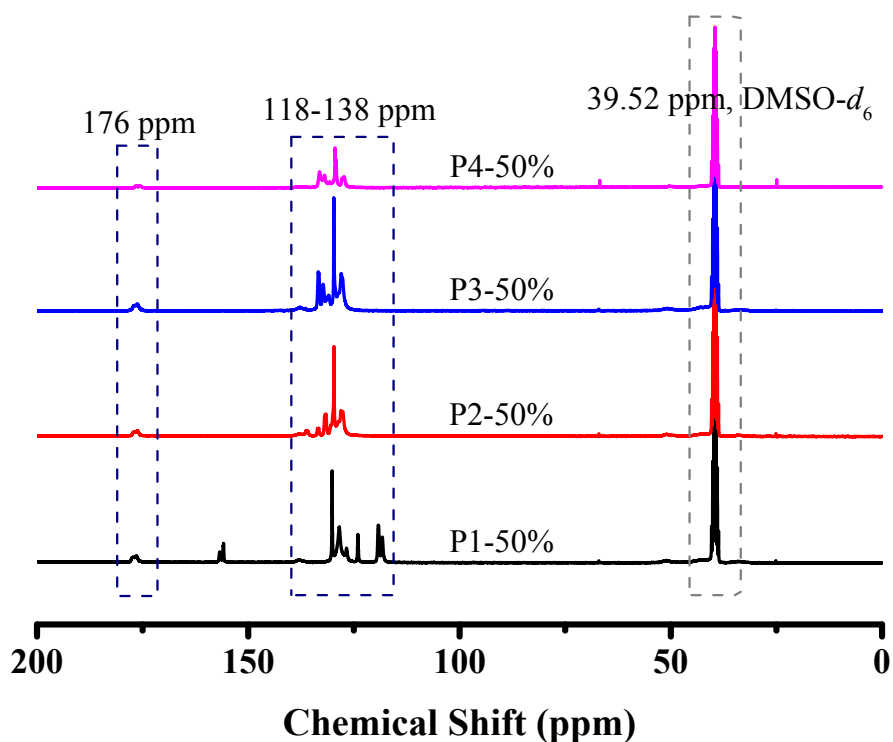

**Figure S4.** <sup>13</sup>C NMR of four copolymers (P1-50% to P4-50%) in DMSO-*d*<sub>6</sub>.

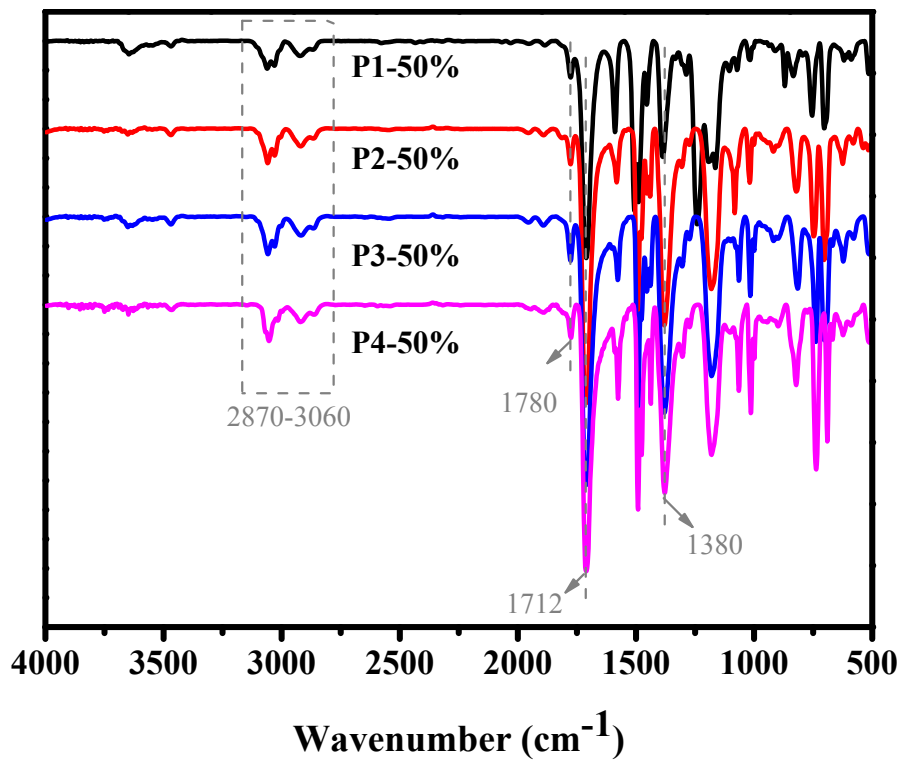

**Figure S5.** FT-IR spectra of four copolymers (P1-50% to P4-50%) with different MI and St or PhSeSt in equal molar ratio.

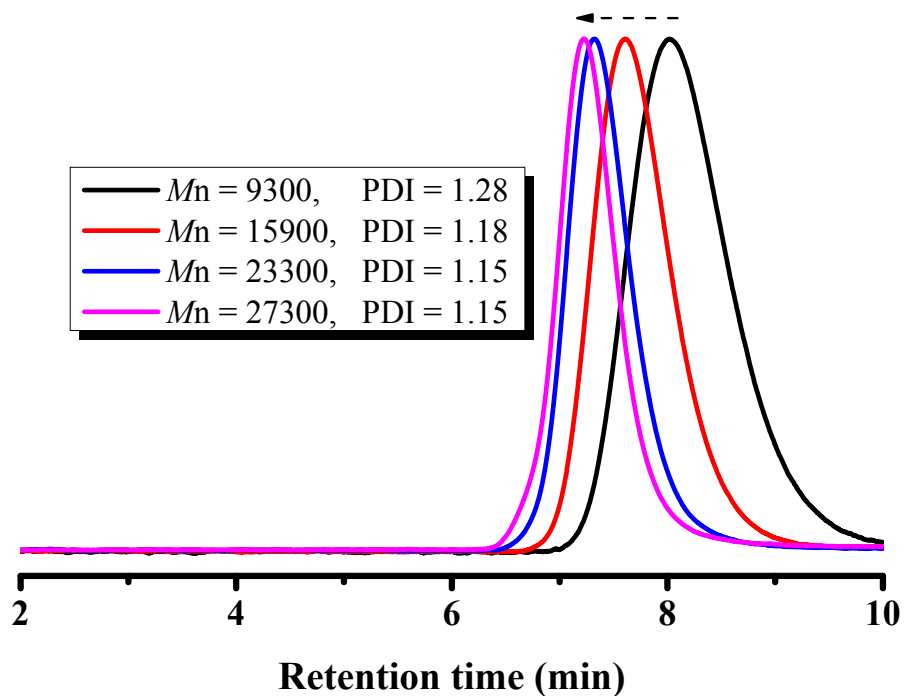

**Figure S6.** GPC trace of P3-50% with different molecular weight.

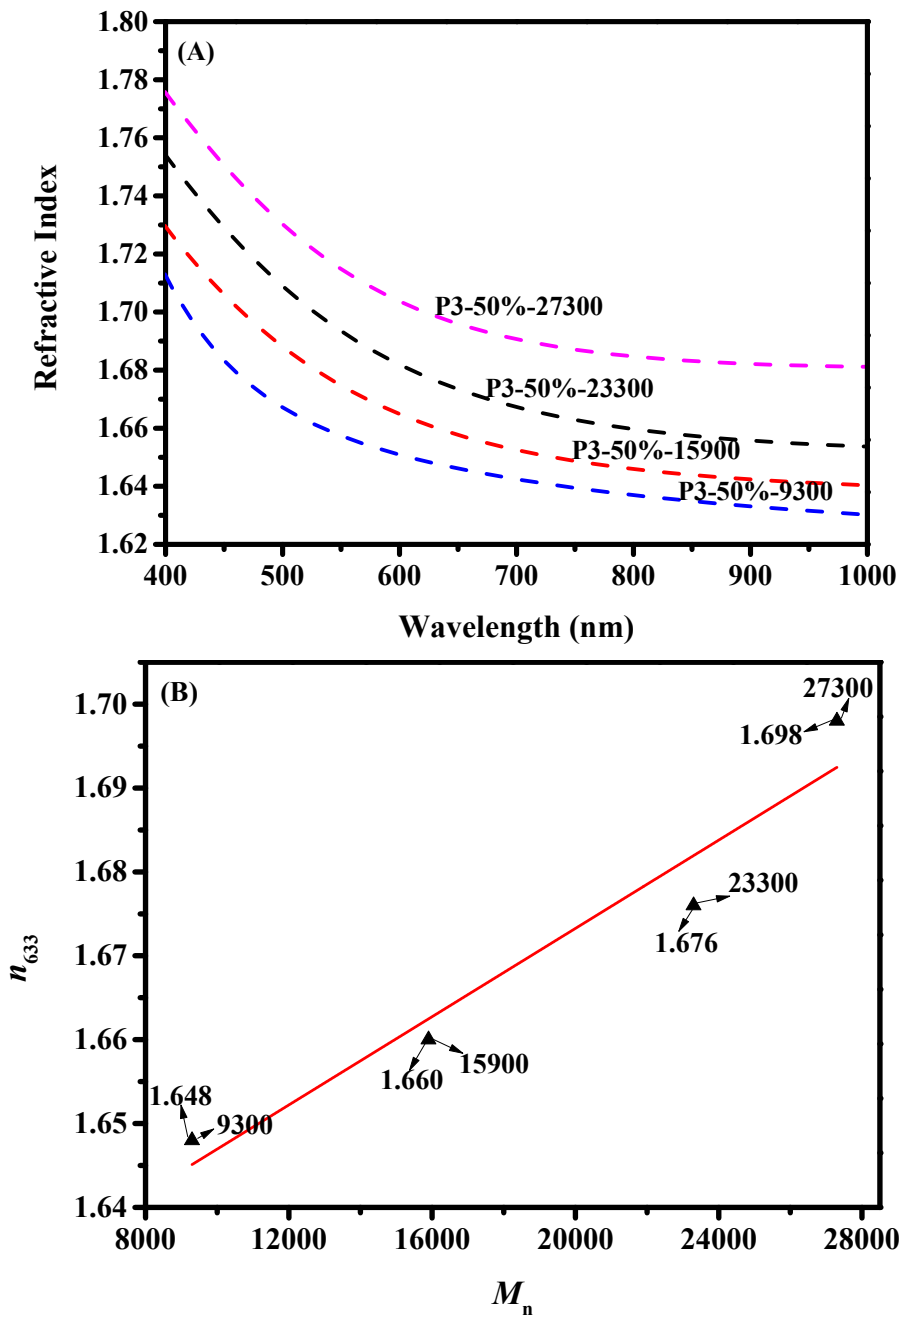

**Figure S7.** (A) RI curves of P3-50% with different molecular weight; (B) liner relation of  $M_n$  and RI at 633nm.

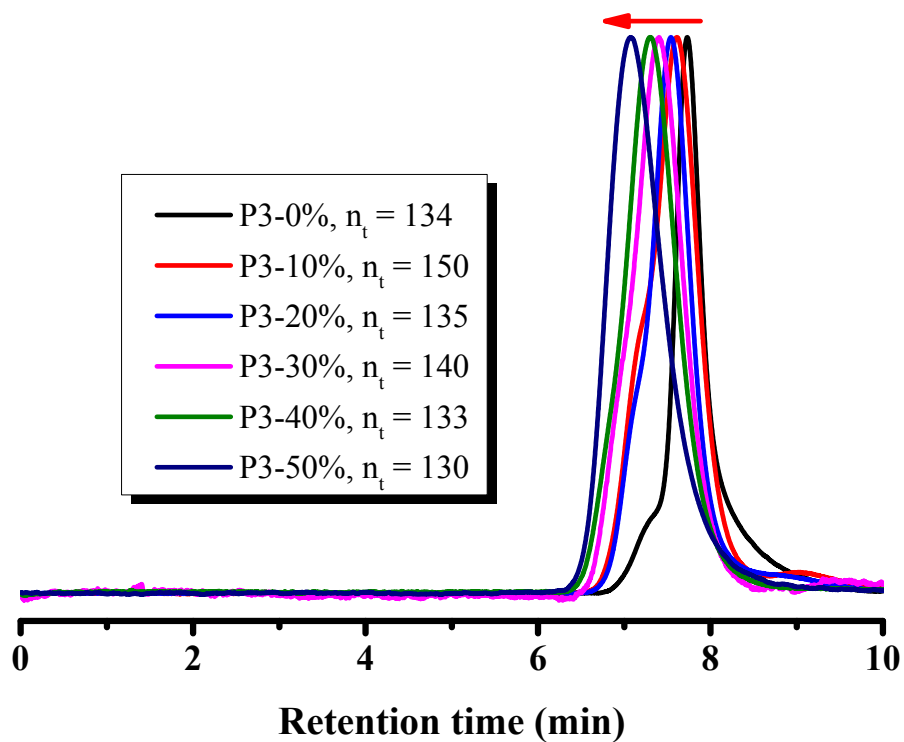

**Figure S8.** GPC trace of copolymers with different molar ratios in DMF and PS used as standard ( $n_t$  means total degree of polymerization).

**Table S1.** The summary of molecular weight, degree of polymerization and polydispersity index of P3s with different monomer ratios.

| Entry  | Monomer Ratios<br>SePMI : St | $M_{n, SEC}$ | $m_1$ | $m_2$ | $n_t$ | $M_w/M_n$ |
|--------|------------------------------|--------------|-------|-------|-------|-----------|
| P3-50% | 50 : 50                      | 28300        | 65    | 65    | 130   | 1.26      |
| P3-40% | 40 : 60                      | 25700        | 53    | 80    | 133   | 1.18      |
| P3-30% | 30 : 70                      | 24000        | 42    | 98    | 140   | 1.16      |
| P3-20% | 20 : 80                      | 20100        | 27    | 108   | 135   | 1.13      |
| P3-10% | 10 : 90                      | 19000        | 15    | 135   | 150   | 1.19      |
| P3-0%  | 0 : 100                      | 14000        | 0     | 134   | 134   | 1.18      |



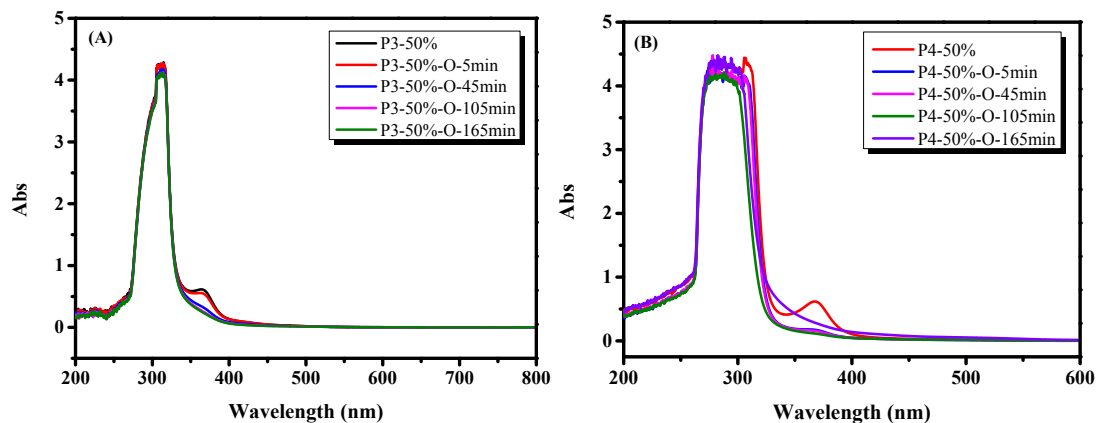

**Figure S9.** UV-vis spectra of the solution of P3-50% and P4-50% oxidated in 30% H<sub>2</sub>O<sub>2</sub> with different time.

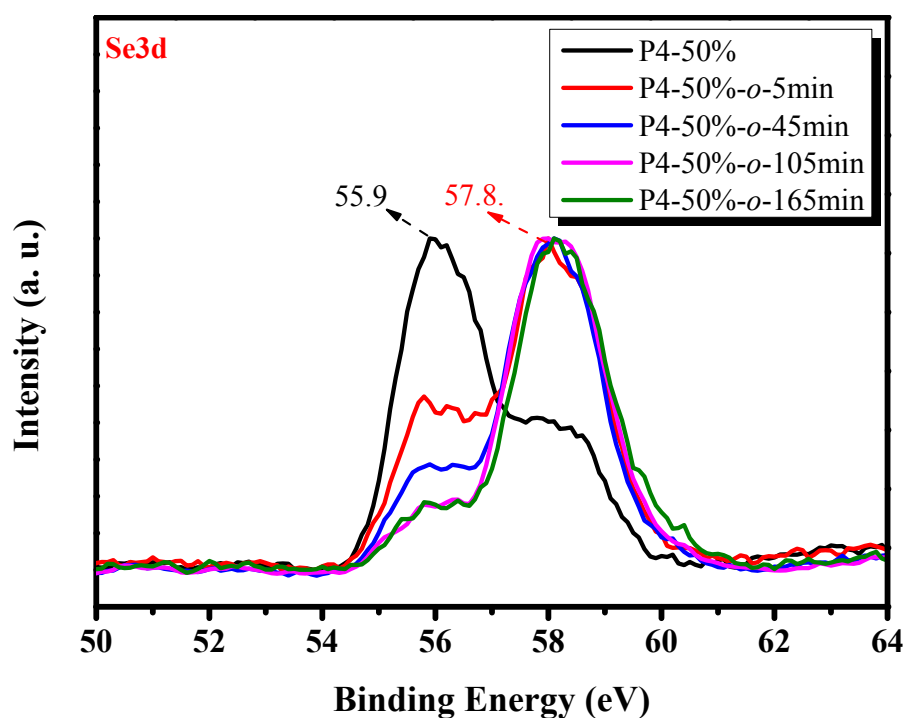

**Figure S10.** XPS data of P4-50% oxidized with different times.

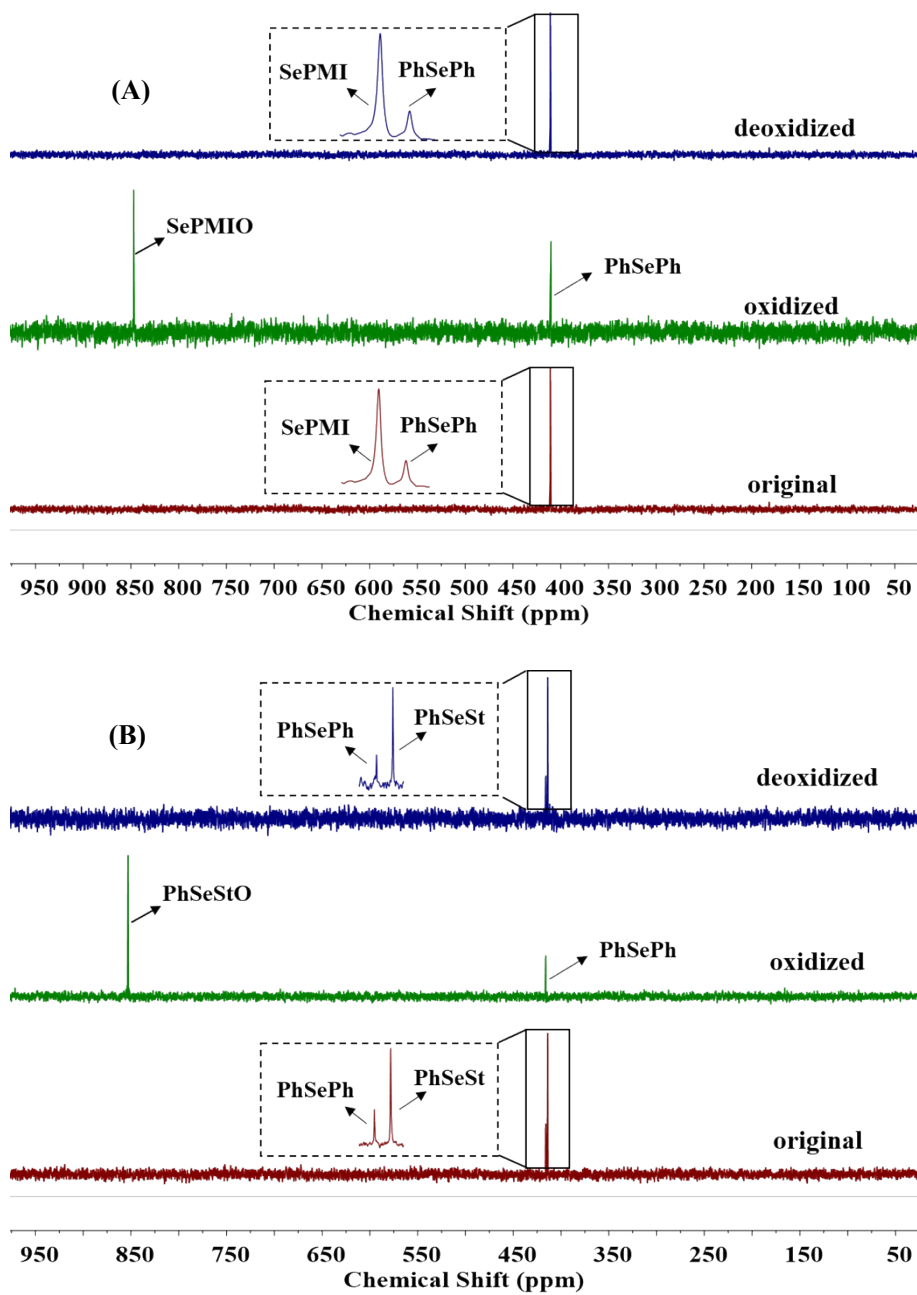

**Figure S11.**  $^{77}\text{Se}$  NMR of SePMI (A) and PhSeSt (B) oxidized and reoxidized.

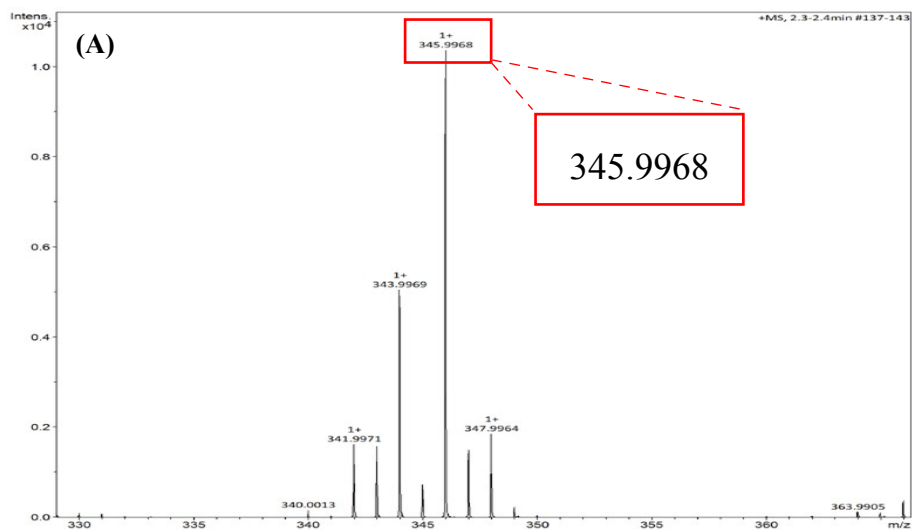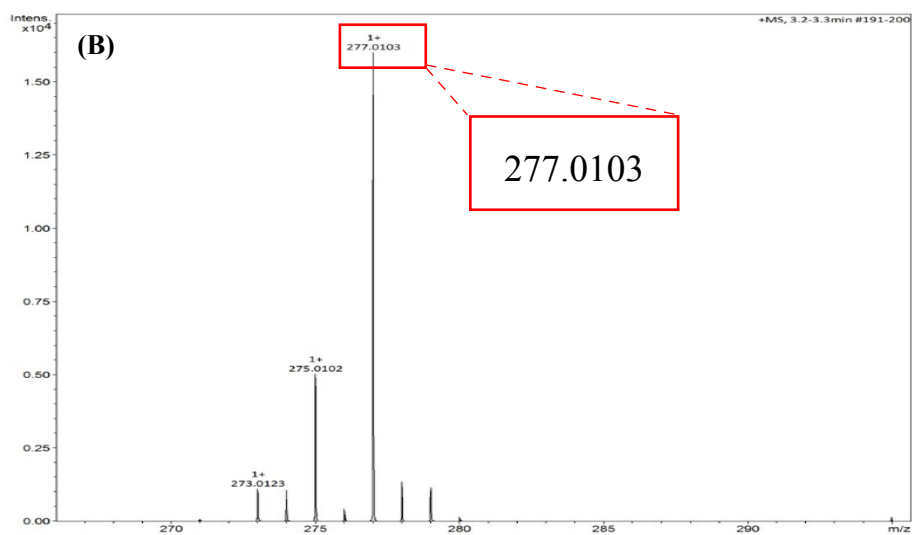

**Figure S12.** Mass spectra of oxidized SePMI and oxidized PhSeSt

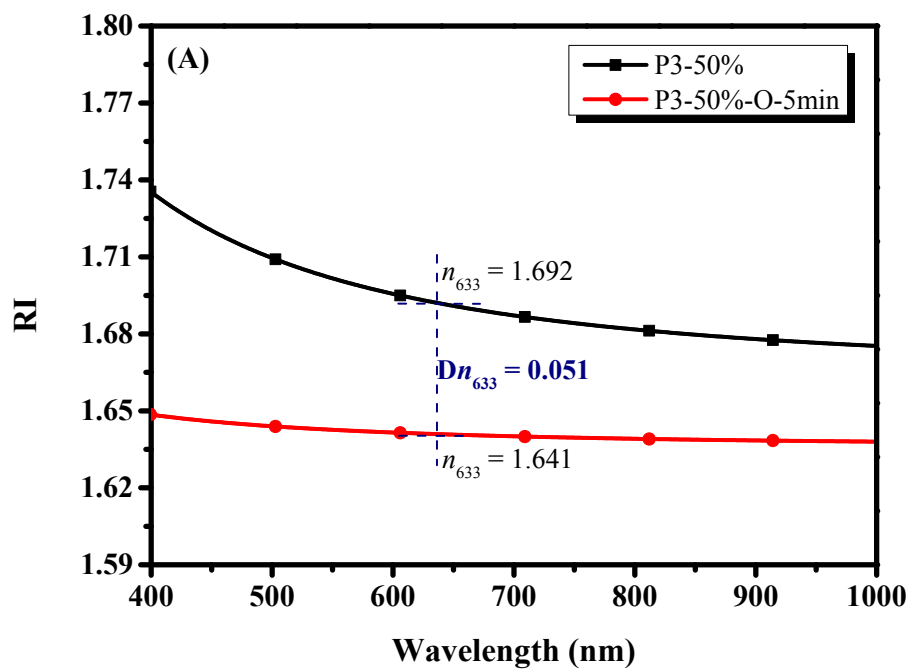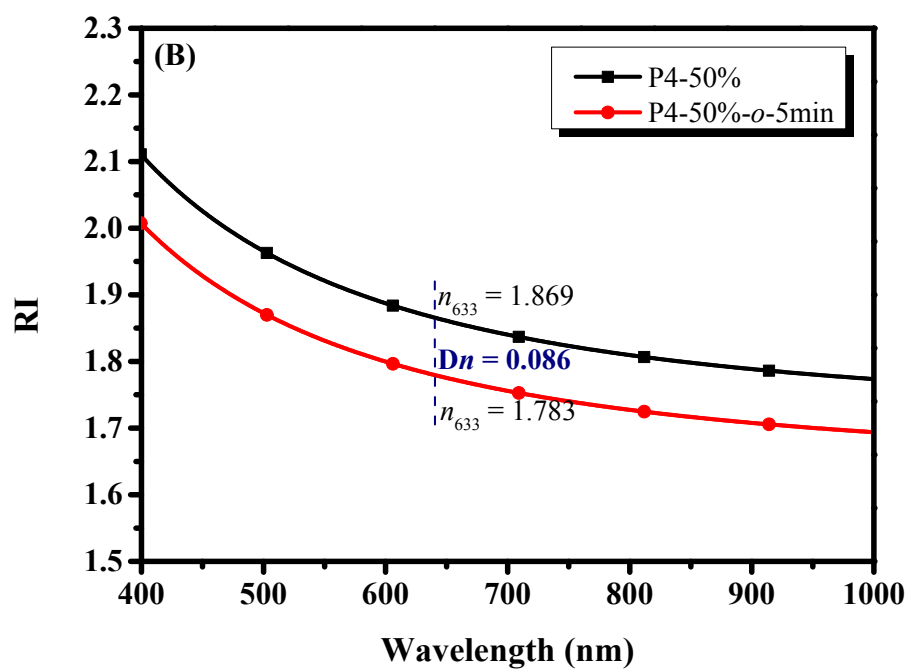

Figure S13. RI change of P3-50% and P4-50% oxidized with 30% H<sub>2</sub>O<sub>2</sub>.
